# Supplementary material for: Individual patient variability with the application of the kidney failure risk equation in advanced chronic kidney disease
Source: PubMed Central journal article supplement (PMC5997334; doi:10.1371/journal.pone.0198456), 2018-06-12

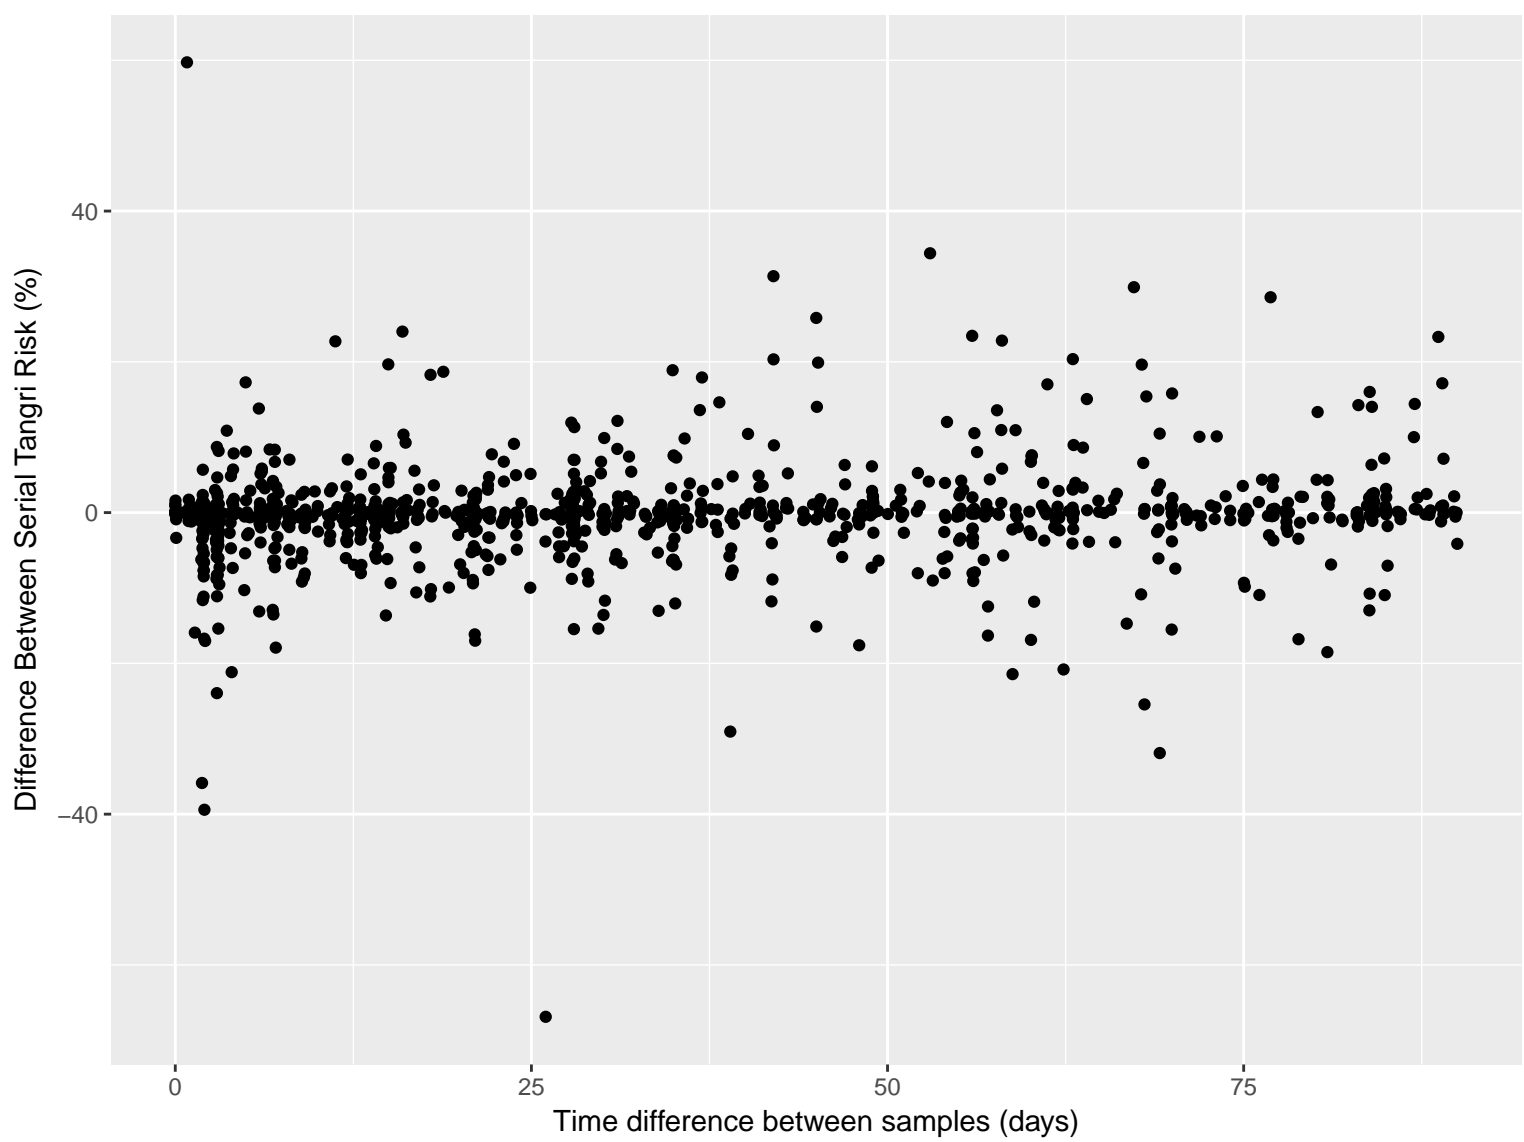

Supplement: pone.0198456.s001.pdf [file pone.0198456.s001.pdf]
